# Supplementary material for: Long-Term Effects of Caffeine Therapy for Apnea of Prematurity
Source: Atypon-hosted journal article supplement (doi:10.1056/nejmoa073679), 2007-11-07
Supplement: nejm_schmidt_1893sa1.pdf [file nejm_schmidt_1893sa1.pdf]

## Supplementary Appendix

This appendix has been provided by the authors to give readers additional information about their work.

Supplement to: Schmidt B, Roberts RS, Davis P, et al. Long-term effects of caffeine therapy for apnea of prematurity. *N Engl J Med* 2007;357:1893-902.

**Supplemental Table 1.** Adverse Events After the First Discharge Home.\*

| <b>Adverse Event</b>                                           | <b>Caffeine</b> | <b>Placebo</b> |
|----------------------------------------------------------------|-----------------|----------------|
| <b>Hospital admission – No. of children with data</b>          | <b>N=907</b>    | <b>N=899</b>   |
| At least one admission                                         | 432 (47.6%)     | 448 (49.8%)    |
| <b>Medical reason for admission:</b>                           |                 |                |
| Respiratory infection                                          | 231 (25.5%)     | 232 (25.8%)    |
| Asthma                                                         | 37 (4.1%)       | 49 (5.5%)      |
| Failure to thrive                                              | 22 (2.4%)       | 15 (1.7%)      |
| Seizure disorder                                               | 6 (0.7%)        | 8 (0.9%)       |
| Shunt infection                                                | 1 (0.1%)        | 0 (0.0%)       |
| Shunt blockage                                                 | 1 (0.1%)        | 1 (0.1%)       |
| Meningitis (in absence of shunt)                               | 1 (0.1%)        | 2 (0.2%)       |
| Head injury                                                    | 3 (0.3%)        | 0 (0.0%)       |
| Other neurological problem                                     | 4 (0.4%)        | 2 (0.2%)       |
| Other non-neurological medical problem                         | 125 (13.8%)     | 133 (14.8%)    |
| <b>Surgical reason for admission:</b>                          |                 |                |
| Gastrostomy                                                    | 9 (1.0%)        | 12 (1.3%)      |
| Other gastrointestinal surgery                                 | 13 (1.4%)       | 14 (1.6%)      |
| Ventriculoperitoneal shunt placement or revision               | 5 (0.6%)        | 2 (0.2%)       |
| Ear, nose, throat surgery                                      | 34 (3.7%)       | 47 (5.2%)      |
| Ligation of patent ductus arteriosus                           | 1 (0.1%)        | 4 (0.4%)       |
| Ophthalmologic surgery                                         | 12 (1.3%)       | 21 (2.3%)      |
| Urogenital surgery                                             | 13 (1.4%)       | 17 (1.9%)      |
| Inguinal hernia repair                                         | 78 (8.6%)       | 63 (7.0%)      |
| Other surgery                                                  | 7 (0.8%)        | 16 (1.8%)      |
| <b>Chronic drug use – No. of children with data†</b>           | <b>N=905</b>    | <b>N=898</b>   |
| Inhaled corticosteroids                                        | 168 (18.6%)     | 174 (19.4%)    |
| Systemic corticosteroids                                       | 21 (2.3%)       | 26 (2.9%)      |
| Bronchodilators                                                | 169 (18.7%)     | 189 (21.0%)    |
| Anticonvulsants                                                | 5 (0.6%)        | 7 (0.8%)       |
| Diuretics                                                      | 24 (2.7%)       | 25 (2.8%)      |
| <b>Respiratory support – No. of children with data</b>         | <b>N=907</b>    | <b>N=901</b>   |
| Supplemental oxygen                                            | 145 (16.0%)     | 172 (19.1%)    |
| Positive airway pressure‡                                      | 15 (1.7%)       | 20 (2.2%)      |
| <b>Additional vision problems – No. of children with data</b>  | <b>N=903</b>    | <b>N=893</b>   |
| Unilateral blindness                                           | 7 (0.8%)        | 6 (0.7%)       |
| Prescription glasses – Myopia                                  | 21 (2.3%)       | 16 (1.8%)      |
| Prescription glasses – Hypermetropia                           | 11 (1.2%)       | 11 (1.2%)      |
| Prescription glasses – Strabismus                              | 5 (0.6%)        | 10 (1.1%)      |
| <b>Additional hearing problems – No. of children with data</b> | <b>N=909</b>    | <b>N=905</b>   |
| Hearing loss of any severity                                   | 145 (16.0%)     | 157 (17.8%)    |

\* Data were obtained from the primary caregiver at follow up or from the children's medical charts where possible.

† Drugs were prescribed for at least 2 months after the first discharge home.

‡ Data on the use of positive airway pressure after the first discharge home was missing for one child.
